# Supplementary material for: The N-Terminal Membrane-Spanning Domain of the Escherichia coli DNA Translocase FtsK Hexamerizes at Midcell
Source: PubMed Central journal article supplement (PMC3870252; doi:10.1128/mbio.00800-13), 2013-12-03
Supplement: mbo006131685sf04.pdf [file mbo006131685sf04.pdf]

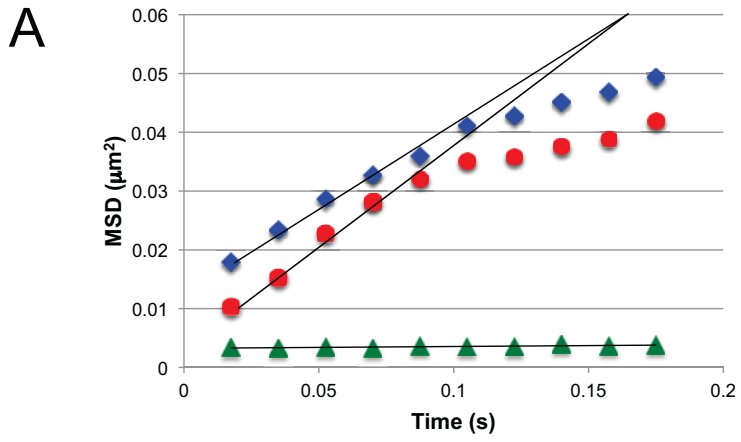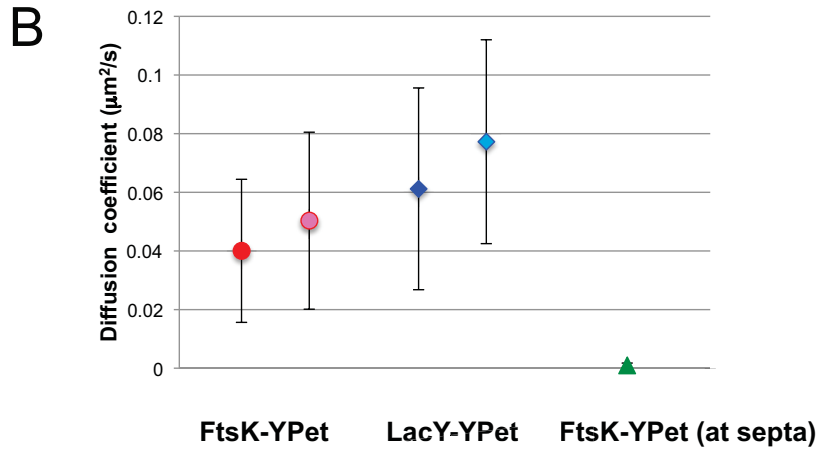

Figure S4 Bisicchia et al.
